# Supplementary material for: Late Miocene to Early Pliocene benthic foraminifera from the Tasman Sea (International Ocean Discovery Program Site U1506)
Source: Copernicus journal article supplement (doi:10.5194/jm-43-1-2024), 2024-01-05
Supplement: Supplementary file 1 [file jm-43-1-2024-supplement.zip]

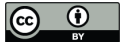

*Supplement of*

**Late Miocene to Early Pliocene benthic foraminifera from the Tasman Sea (International Ocean Discovery Program Site U1506)**

**Maria Elena Gastaldello et al.**

*Correspondence to:* Maria Elena Gastaldello ([mariaelena.gastaldello@phd.unipd.it](mailto:mariaelena.gastaldello@phd.unipd.it))

- [jm-43-1-2024-supplement-title-page.pdf](#)
- [Table S1. Benthic foraminifera counts from IODP Hole 371-U1506A.xlsx](#)
- [Table S2. Benthic foraminifera accumulation rates \(BFAR\) from IODP Hole 371-U1506A.xlsx](#)

The copyright of individual parts of the supplement might differ from the article licence.
